# Supplementary material
Source: publisher figshare collection journal article supplement (https://gsapubs.figshare.com/ndownloader/files/23319935)
Supplement: Supplementary file 1 [file 23319935]

## Sheet: Sheet1
Table DR3. Major element compositions for melt inclusions (raw data and corrected), olivine hosts, and analytical standards as determined by Electron Microprobe Analysis (EPMA) (see detailed methods in caption)
								Melt inclusion composition (uncorrected, hydrous)														Host olivine crystal composition														Correction Parameters						Melt inclusion composition (corrected, anhydrous)
Volcano	Eruption	Volume magma	Location	Type	Sample number	Crystal	Inclusion	SiO2	TiO2	Al2O3	FeO*	MnO	MgO	CaO	Na2O	K2O	P2O5	Cl	S	Original Total		SiO2	Al2O3	K2O	MnO	FeO	NiO	Na2O	MgO	Cr2O3	TiO2	CaO	Total	Fo#		Fo# (eq)	Fe3+/Fetotal	Olivine addition/subtraction (%)	KD (measured)	KD (corrected)		SiO2	TiO2	Al2O3	FeO*	MnO	MgO	CaO	Na2O
Taupo	Waimihia (3.2 ka)	7.5 km3	38°49'29.86"S 176° 8'33.06"E	Single mafic enclave	P2202A (Mount 1)	1		49.0584	0.584	15.2195	10.1421	0.1756	9.598	9.9142	1.7845	0.3356	0.2451	0.0569	0.1053	97.3243		39.3472	0.0376	0.0026	0.2574	14.805	0.0632	0	44.4658	0.0176	0.0057	0.1793	99.1815	84.2605		84.2386	0.15	-5.6	0.370695	0.299507		51.0054	0.635325	16.5571	10.1477	0.191033	7.75908	10.7855	1.94133
					P2202A (Mount 1)	2		47.4376	0.7602	15.2452	11.4293	0.1713	10.2981	10.098	1.7789	0.1889	0.1244	0.069	0.1731	97.9469		39.2824	0.0399	0.0206	0.2352	15.2751	0.059	0.0054	44.0965	0.0187	0.0005	0.1871	99.2205	83.7281		83.7182	0.15	-5.8	0.367196	0.299781		48.9599	0.823553	16.5157	11.4404	0.185576	8.41556	10.9395	1.92715
					P2202A (Mount 1)	3	a	48.4021	0.7221	15.1811	11.0066	0.202	10.0928	10.2362	1.6764	0.1906	0.1264	0.076	0.1606	98.2331		39.2593	0.0362	0	0.2284	14.3046	0.1002	0.0673	44.6883	0.0237	0.0144	0.1664	98.8887	84.7756		84.7568	0.15	-4	0.34532	0.299562		49.6539	0.765581	16.0952	11.0665	0.214163	8.80304	10.8526	1.77734
					P2202A (Mount 1)		b	48.3974	0.7807	16.0643	11.3814	0.2041	7.8884	10.9765	1.8878	0.2096	0.1423	0.0827	0.1712	98.3574		39.327	0.0505	0.0228	0.2364	14.5255	0.1123	0.0395	44.795	0.0218	0.009	0.1909	99.3308	84.6079		84.6166	0.15	3.2	0.264409	0.300202		48.8914	0.768116	15.8054	11.6884	0.20081	9.19781	10.7996	1.85737
					P2202A (Mount 1 r2)	4	a	48.8767	0.739	15.4179	9.8905	0.1864	10.4041	9.7637	1.9285	0.207	0.1663	0.0597	0.168	97.9754		39.8014	0.0407	0.0094	0.277	14.9223	0.0196	0.0053	44.5507	0.0226	0	0.1792	99.8283	84.1809		84.2384	0.15	-8.8	0.414523	0.3013		50.8462	0.825545	17.2235	9.63545	0.208229	7.3673	10.9071	2.15435
					P2202A (Mount 1 r2)		a	48.4132	0.7563	15.3514	9.9646	0.1879	10.4081	9.8425	1.8448	0.1856	0.1899	0.065	0.1556	97.5202		39.8014	0.0407	0.0094	0.277	14.9223	0.0196	0.0053	44.5507	0.0226	0	0.1792	99.8283	84.1809		84.2567	0.15	-8.6	0.411599	0.301716		50.5557	0.84731	17.1987	9.7771	0.210511	7.48593	11.0269	2.0668
					P2202A (Mount 1 r2)		b	47.3855	0.7404	15.3905	9.9472	0.177	10.4255	9.7962	1.8499	0.2147	0.163	0.0694	0.1635	96.4859		39.8014	0.0407	0.0094	0.277	14.9223	0.0196	0.0053	44.5507	0.0226	0	0.1792	99.8283	84.1809		84.1944	0.15	-8.8	0.413008	0.300304		50.0095	0.841053	17.4827	9.86227	0.201062	7.51581	11.1279	2.10138
					P2202A (Mount 1 r2)	3		47.7417	0.6909	15.2403	10.333	0.1434	10.3074	9.5688	1.8224	0.2086	0.1097	0.0591	0.162	96.549		38.7323	0.0414	0.0045	0.2235	14.6534	0.0594	0.0004	44.2933	0.0144	0.0113	0.1766	98.2105	84.3452		84.3267	0.15	-7.2	0.388243	0.299579		50.1955	0.771213	17.0119	10.3805	0.160069	7.99004	10.6811	2.03424
					P2202A (Mount 1 r2)	2	a	48.0692	0.7525	15.5378	11.0856	0.1671	10.299	9.7932	1.8347	0.1928	0.1049	0.071	0.1637	98.2349		39.5088	0.0094	0	0.2193	15.4172	0.079	0.0217	44.2035	0.027	0.0042	0.1992	99.6893	83.6348		83.6199	0.15	-6.8	0.381211	0.299675		49.5898	0.821001	16.9522	10.9829	0.182311	8.02115	10.6847	2.00171
					P2202A (Mount 1 r2)		a	48.5349	0.723	15.4059	11.1051	0.1541	10.3218	9.696	1.9344	0.1665	0.1307	0.0648	0.1729	98.5826		39.5088	0.0094	0	0.2193	15.4172	0.079	0.0217	44.2035	0.027	0.0042	0.1992	99.6893	83.6348		83.6358	0.15	-6.8	0.381384	0.300023		49.9133	0.785909	16.7464	10.9636	0.167508	8.01639	10.5397	2.10272
					P2202A (Mount 1 r3)	5	a	47.401	0.7691	14.8587	9.8111	0.1877	10.5318	10.0406	1.9081	0.1933	0.116	0.0705	0.1837	96.2775		38.9204	n/d	n/d	n/d	14.7927	0.083	n/d	44.0371	n/d	n/d	0.1878	98.021	84.1426		84.1287	0.15	-9.6	0.424223	0.299687		50.26	0.883549	17.0698	9.68827	0.215632	7.3469	11.5347	2.19204
					P2202A (Mount 1 r3)		b	47.393	0.7785	14.8774	9.7539	0.1605	10.5067	9.8507	1.7693	0.1874	0.1888	0.0749	0.1838	95.9248		38.9204	n/d	n/d	n/d	14.7927	0.083	n/d	44.0371	n/d	n/d	0.1878	98.021	84.1426		84.167	0.15	-9.6	0.425694	0.300548		50.4523	0.897934	17.1598	9.66117	0.185123	7.3474	11.362	2.04074
					P2202A (Mount 1 r3)	6		47.9608	0.7322	15.0671	9.8626	0.166	10.5342	10.2718	1.8763	0.1831	0.1441	0.0741	0.1773	97.2454		38.9739	n/d	n/d	n/d	14.361	0.0944	n/d	44.4235	n/d	n/d	0.1965	98.0494	84.6477		84.6723	0.15	-8.4	0.406222	0.300569		50.1983	0.821525	16.9052	9.74514	0.186251	7.70157	11.5249	2.1052
					P2202A (Mount 1 r3)	7		47.7646	0.72	15.0051	10.6756	0.2011	10.2854	10.1587	1.8618	0.1508	0.149	0.0699	0.1829	97.4345		39.0487	n/d	n/d	n/d	14.3731	0.0886	n/d	44.0873	n/d	n/d	0.1863	97.784	84.5377		84.5735	0.15	-5.8	0.369528	0.300823		49.6075	0.784771	16.355	10.7325	0.219191	8.41773	11.0726	2.02929
				Single mafic enclave	P2224 (Mount 1)	1		47.9873	0.7541	15.4414	11.4859	0.205	10.4366	10.1902	1.7364	0.1584	0.1275	0.0621	0.1473	98.8792		39.6019	0.0325	0	0.2494	15.1692	0.0933	0	44.3277	0.0206	0.0063	0.2104	99.7114	83.8935		83.8638	0.15	-5.8	0.365816	0.299343		49.0441	0.808543	16.5562	11.3921	0.2198	8.4704	10.9259	1.86176
					P2224 (Mount 1)	2	a	49.0068	0.728	15.1385	11.0427	0.1527	10.3392	9.8708	1.8706	0.3466	0.238	0.0753	0.1495	99.1081		40.219	0.0311	0	0.2481	15.4981	0.077	0	44.4899	0.0139	0	0.2119	100.789	83.6515		83.6339	0.15	-7	0.383716	0.299613		50.149	0.788258	16.3915	10.8231	0.165339	7.91249	10.6878	2.02543
					P2224 (Mount 1)		b	48.8015	0.782	15.1319	10.0606	0.1899	10.5212	9.9425	1.7559	0.3533	0.1949	0.0755	0.1365	98.082		39.2457	0.0411	0	0.2319	15.2913	0.0527	0	44.5177	0.0115	0.0085	0.2304	99.6308	83.8429		83.9206	0.15	-9.4	0.422605	0.30173		50.7559	0.877597	16.9817	9.74847	0.213115	7.27885	11.1579	1.97055
					P2224 (Mount 1)		c	48.6676	0.7817	15.0872	10.5904	0.172	10.5463	10.0567	1.6936	0.3201	0.2339	0.0737	0.1473	98.5177		39.5091	0.027	0	0.2177	15.1817	0.0875	0	44.6794	0.0238	0.0102	0.2085	99.9451	83.9889		84.0061	0.15	-8	0.398091	0.300383		50.2071	0.860629	16.6106	10.3739	0.189367	7.79517	11.0721	1.8646
					P2224 (Mount 1)	3		47.3704	0.711	15.7497	12.1177	0.1798	10.0221	10.2872	1.6882	0.1538	0.0997	0.0693	0.1628	98.7743		39.6695	0.0419	0.0135	0.228	15.2566	0.0557	0.0097	44.2951	0.0134	0.0033	0.1886	99.7753	83.8057		83.7948	0.15	-3.2	0.335136	0.29976		48.2121	0.74332	16.4656	12.1629	0.187973	8.99762	10.7548	1.76494
					P2224 (Mount 1 r2)	2	a	47.0193	0.7014	14.9578	10.2972	0.1906	10.5693	9.3456	1.8842	0.3549	0.1922	0.0635	0.1423	95.8604		40.2239	0.0166	0	0.2207	15.3715	0.0912	0.0066	44.4225	0.0142	0.005	0.1922	100.565	83.7428		83.808	0.15	-9.2	0.417851	0.301442		49.9836	0.805593	17.1798	10.2718	0.218914	7.60603	10.7339	2.1641
					P2224 (Mount 1 r2)		b	47.1784	0.7151	14.8701	10.1791	0.1691	10.4622	9.2823	1.852	0.328	0.2191	0.0659	0.1444	95.6096		40.2239	0.0166	0	0.2207	15.3715	0.0912	0.0066	44.4225	0.0142	0.005	0.1922	100.565	83.7428		83.767	0.15	-9.2	0.418416	0.300535		50.3134	0.823737	17.1291	10.166	0.194789	7.50496	10.6925	2.13335
					P2224 (Mount 1 r2)	4	a	48.4278	0.7085	15.4069	10.9165	0.1928	10.4163	10.061	1.7998	0.1352	0.1076	0.0719	0.1531	98.5503		40.0044	0.0321	0	0.2407	15.2905	0.1105	0.0012	44.544	0.0163	0.0072	0.1758	100.423	83.8516		83.7997	0.15	-7.2	0.38534	0.298853		49.8442	0.773427	16.8188	10.7557	0.210468	7.95947	10.983	1.96473
					P2224 (Mount 1 r2)		b	47.6028	0.6998	15.4379	10.8008	0.1759	10.392	9.9261	1.8546	0.1665	0.0942	0.0913	0.1755	97.5925		40.0044	0.0321	0	0.2407	15.2905	0.1105	0.0012	44.544	0.0163	0.0072	0.1758	100.423	83.8516		83.7973	0.15	-7.4	0.388559	0.2988		49.4941	0.7738	17.0704	10.7353	0.1945	7.94298	10.9757	2.05071
					P2224_(Mount 2)	1		47.435	0.7384	15.1632	11.4862	0.2082	10.236	9.8294	1.8956	0.164	0.0888	0.0677	0.1645	97.6413		38.7532	0.0167	0.0026	0.2363	15.1661	0.0531	0	44.4324	0.0231	0	0.191	98.8745	83.9281		83.9514	0.15	-5	0.357857	0.300519		49.0353	0.795927	16.3445	11.5795	0.22442	8.66576	10.5952	2.04328
Taupo	Oruanui (25.4 ka)	530 km3	38°40'35.84"S 176° 1'38.62"E	Single mafic enclave	P560 (Mount 1)	1		47.434	0.6254	14.7648	11.5893	0.169	11.1404	9.5991	1.5164	0.1641	0.0744	0.068	0.135	97.4149		39.3756	0.051	0	0.233	14.3571	0.1013	0	44.9601	0.0159	0.0093	0.1876	99.2909	84.8066		84.8489	0.15	-5.6	0.36113	0.300988		49.1874	0.679736	16.0476	11.7393	0.183683	9.40522	10.4331	1.64815
					P560 (Mount 1)	3		47.3563	0.6653	15.1882	9.9501	0.1698	11.1475	10.3106	1.51	0.204	0.1405	0.0606	0.1493	97.0012		39.016	0.0334	0.011	0.2038	13.9007	0.0888	0	45.0397	0.0248	0	0.1885	98.5067	85.2405		85.1901	0.15	-9	0.406792	0.298803		49.6806	0.752775	17.1852	9.88641	0.192126	8.13582	11.6663	1.70854
					P560 (Mount 1)	4		47.9733	0.6061	15.494	10.0955	0.1801	11.1103	10.0318	1.5532	0.1378	0.1069	0.0549	0.1407	97.6249		39.6597	0.0368	0	0.1993	13.8418	0.1182	0.0346	44.8679	0.0186	0.0041	0.2121	98.9932	85.2458		85.2441	0.15	-8.4	0.399426	0.299959		49.9571	0.676704	17.2989	10.0046	0.20108	8.26845	11.2004	1.73413
					P560 (Mount 1)	5		47.5179	0.6443	15.9369	12.0718	0.1974	8.8676	10.6882	1.5115	0.1624	0.1137	0.0632	0.1431	98.0609		39.4389	0.0297	0.0079	0.2195	13.8487	0.1262	0.0215	45.0682	0.0263	0.0016	0.175	98.9635	85.2955		85.2955	0.15	3.4	0.265555	0.300001		48.1349	0.634226	15.6877	12.3825	0.194314	10.2757	10.5211	1.48787
					P560 (Mount 1)	7	a	48.1532	0.5871	15.5401	10.8348	0.1958	11.2294	9.8045	1.5711	0.1316	0.0819	0.0681	0.1459	98.4891		40.073	0.0319	0	0.236	13.9998	0.0884	0	45.243	0.0124	0.0083	0.1745	99.8675	85.2077		85.1777	0.15	-7	0.3773	0.299287		49.5371	0.639972	16.9396	10.7699	0.213433	8.8542	10.6874	1.71259
					P560 (Mount 1)		b	47.693	0.6063	15.5101	10.8566	0.1528	11.2687	9.9326	1.5534	0.1426	0.0747	0.0756	0.1513	98.1688		40.073	0.0319	0	0.236	13.9998	0.0884	0	45.243	0.0124	0.0083	0.1745	99.8675	85.2077		85.2108	0.15	-7	0.37786	0.300073		49.21	0.663254	16.9671	10.8321	0.167153	8.92871	10.8656	1.69932
					P560 (Mount 2)	1		47.9364	0.5778	15.4319	11.8676	0.2381	10.0582	10.3039	1.556	0.1639	0.0869	0.0639	0.1262	98.5368		39.0654	0.0438	0.0088	0.1893	14.3422	0.1078	0.0309	44.5392	0.0205	0.0084	0.1865	98.5428	84.6985		84.6788	0.15	-2	0.321079	0.299546		48.7934	0.598006	15.9716	11.9839	0.246427	9.47565	10.6642	1.61041
					P560 (Mount 2)	3		48.1438	0.5862	14.9094	10.3326	0.1699	10.8158	9.7416	1.5195	0.1625	0.0906	0.0656	0.1496	96.8363		39.084	0.0308	0	0.2282	13.8224	0.0843	0	44.7777	0.0207	0.006	0.1778	98.232	85.2381		85.2756	0.15	-6.8	0.380147	0.300897		50.4199	0.649449	16.5181	10.4211	0.188232	8.63432	10.7927	1.68345
				Single mafic enclave	P950 (Mount 1)	2		47.7515	0.6106	15.0784	9.7388	0.1452	11.1248	10.3219	1.4594	0.1457	0.0776	0.0622	0.158699	96.8332		39.3926	0.0272	0	0.2126	14.1464	0.083	0.0206	45.4525	0.0143	0.0098	0.1874	99.5466	85.1345		85.1485	0.15	-9.6	0.418269	0.300331		50.2969	0.696635	17.203	9.63012	0.165659	7.89883	11.7763	1.66503
					P950 (Mount 1)	3		47.4658	0.6714	15.1539	10.4327	0.2102	9.9991	10.5447	1.5047	0.1705	0.0587	0.0696	0.157297	96.5957		39.1426	0.0441	0	0.1795	14.3785	0.1422	0.0065	45.3242	0.0174	0.0003	0.1692	99.4045	84.8911		84.9116	0.15	-4.8	0.357708	0.300478		49.6043	0.73051	16.488	10.617	0.228706	8.54772	11.4731	1.63717
					P950 (Mount 1)	5		47.3757	0.5948	15.3012	10.8265	0.1596	10.6706	10.5256	1.4212	0.1378	0.0811	0.0584	0.168708	97.4896		39.4165	0.0109	0	0.1843	14.5106	0.075	0	45.5015	0.0064	0	0.1808	99.8861	84.8238		84.8669	0.15	-6	0.369778	0.301006		49.1468	0.648947	16.6941	10.8934	0.174129	8.73974	11.4838	1.55058
					P950 (Mount 1)	6		47.6931	0.6605	15.1513	10.3804	0.1826	11.2055	10.1009	1.507	0.1686	0.0783	0.074	0.148089	97.498		39.6065	0.0335	0.0059	0.2267	14.5128	0.0502	0.0243	45.615	0.0235	0.0017	0.2019	100.302	84.8539		84.872	0.15	-8.8	0.404056	0.300424		49.7631	0.741569	17.0109	10.2897	0.205012	8.25871	11.3407	1.69197
					P950 (Mount 1)	8		47.0852	0.607	14.9335	11.058	0.1852	10.3781	10.3386	1.4195	0.199	0.0935	0.0618	0.150741	96.6606		39.9296	0.034	0	0.1894	14.5342	0.0411	0	45.5078	0.0242	0.0018	0.2337	100.496	84.8046		84.829	0.15	-4.6	0.352637	0.300569		49.1278	0.658482	16.2001	11.2898	0.200907	9.03119	11.2155	1.53989
					P950 (Mount 1)	9		46.9236	0.6454	15.4524	10.8188	0.1882	9.0445	10.7641	1.5075	0.1146	0.0892	0.0613	0.140982	95.8915		39.6418	0.028	0.0127	0.2164	14.2751	0.1311	0	45.3134	0.0209	0.0099	0.1834	99.8326	84.9804		85.0022	0.15	-0.8	0.309841	0.300511		48.9898	0.67843	16.2432	11.2525	0.197832	9.12384	11.315	1.58465
					P950 (Mount 1)	10	a	48.3222	0.6302	14.9873	9.8322	0.1634	11.2339	10.0278	1.5064	0.1192	0.069	0.0638	0.164754	97.2845		39.6879	0.0103	0	0.2449	15.0263	0.0607	0	45.1311	0.0122	0.007	0.17	100.35	84.2606		84.2581	0.15	-11.6	0.447545	0.299943		50.9342	0.730328	17.3685	9.49704	0.189361	7.27226	11.621	1.74574
					P950 (Mount 1)		b	47.6981	0.63	14.9677	9.779	0.1657	11.2312	10.2351	1.519	0.1141	0.0583	0.0637	0.156747	96.775		39.3283	0.0469	0.0167	0.2268	14.7059	0.0535	0	45.0978	0.0183	0	0.1431	99.6373	84.5347		84.5039	0.15	-11.2	0.440605	0.299294		50.4545	0.731314	17.3747	9.54264	0.192347	7.44475	11.8811	1.76328
					P950 (Mount 1)	11		46.4896	0.6509	15.5234	12.0198	0.2057	9.0978	10.7033	1.2833	0.2381	0.0662	0.034	0.102846	96.5176		39.5499	0.0304	0.0026	0.2416	14.3572	0.0792	0.0011	45.403	0.0151	0.0063	0.166	99.8524	84.9324		84.8622	0.15	1.6	0.281582	0.298362		47.9815	0.662606	15.8026	12.4774	0.209399	10.0069	10.8958	1.30638
					P950 (Mount 1)	12		47.6181	0.6113	15.3868	10.8347	0.183	10.4254	10.5117	1.5532	0.1635	0.0622	0.0643	0.152943	97.7198		39.8139	0.0208	0	0.2271	14.2858	0.0961	0.0393	45.1863	0.0221	0.0056	0.1714	99.8682	84.935		84.9658	0.15	-5	0.357894	0.300724		49.1815	0.658356	16.5712	10.9144	0.197087	8.8245	11.3209	1.67276
					P950 (Mount 1)	15		48.0076	0.6401	15.4602	10.474	0.1986	10.1914	10.6373	1.4309	0.1233	0.1094	0.0669	0.14924	97.6379		40.2434	0.0354	0.0083	0.2194	14.2335	0.0954	0	45.1509	0.0145	0.0072	0.1918	100.2	84.9718		84.9496	0.15	-5.2	0.360867	0.299478		49.6658	0.69142	16.6997	10.5296	0.214523	8.50256	11.4901	1.54562
					P950 (Mount 1 r2)	16	a	47.2829	0.5703	15.6341	9.9408	0.1745	11.1822	10.1834	1.6186	0.1244	0.0865	0.052	0.145	97.1395		39.6845	0.038	0.0013	0.2088	14.4683	0.0726	0.0035	45.2428	0.0192	0	0.1972	99.9363	84.7879		84.8076	0.15	-10	0.423209	0.300457		49.6261	0.650963	17.8454	9.77331	0.199181	7.80504	11.6237	1.84753
					P950 (Mount 1 r2)		a	47.8423	0.5622	15.6511	10.0227	0.1568	11.2286	10.2872	1.5214	0.1688	0.119	0.0534	0.1364	97.8861		39.6845	0.038	0.0013	0.2088	14.4683	0.0726	0.0035	45.2428	0.0192	0	0.1972	99.9363	84.7879		84.7721	0.15	-10	0.421493	0.299631		49.8343	0.636223	17.7118	9.78228	0.177445	7.79072	11.6417	1.72172
					P950 (Mount 1 r2)		b	47.5314	0.5676	15.7979	10.0088	0.1422	11.1656	10.1983	1.5732	0.1785	0.0778	0.0508	0.1383	97.5683		39.6845	0.038	0.0013	0.2088	14.4683	0.0726	0.0035	45.2428	0.0192	0	0.1972	99.9363	84.7879		84.7905	0.15	-9.8	0.41971	0.30006		49.6419	0.643338	17.9059	9.81156	0.161175	7.82522	11.5591	1.78312
					P950 (Mount 1 r2)	7		48.1353	0.6319	15.3781	11.0646	0.171	9.8369	9.9576	1.6083	0.2616	0.1384	0.0745	0.1471	97.5522		40.2754	0.0297	0	0.2331	14.2737	0.0955	0.0109	45.1484	0.0156	0.0024	0.1787	100.263	84.9351		84.9873	0.15	-2.6	0.330672	0.30123		49.5804	0.665062	16.1851	11.2573	0.179974	9.11712	10.4802	1.6927
					P950 (Mount 1 r2)	9	a	48.6329	0.6396	16.4898	11.1204	0.1709	9.3477	10.5034	1.5518	0.2848	0.0702	0.0561	0.0672	99.0018		39.8546	0.017	0.0161	0.2315	14.4301	0.1086	0	45.2057	0.0138	0.0008	0.1871	100.065	84.8114		84.7966	0.15	-1.4	0.315676	0.299656		49.1961	0.654491	16.8737	11.1734	0.174879	8.91561	10.7479	1.58793
					P950 (Mount 1 r2)		b	47.2235	0.6254	15.8439	11.497	0.1903	9.9294	10.3894	1.5989	0.0917	0.075	0.0622	0.1364	97.799		39.6064	0.0373	0.0015	0.2268	14.4845	0.0857	0.0328	45.1599	0.0119	0.0064	0.1775	99.8304	84.7498		84.7216	0.15	-2.4	0.325889	0.299348		48.4686	0.655044	16.5949	11.6811	0.19932	9.26679	10.8819	1.67469
					P950 (Mount 1 r2)	17		47.771	0.6654	15.7394	10.7914	0.1786	10.9436	10.0155	1.5439	0.136	0.0807	0.0697	0.1585	98.2519		39.4785	0.0261	0.0027	0.2424	13.9256	0.1006	0.0099	45.4023	0.0085	0.0116	0.1869	99.3951	85.3186		85.3708	0.15	-5.8	0.365931	0.301254		49.1399	0.718436	16.9939	10.7984	0.192835	9.01517	10.8138	1.66696
					P950 (Mount 1 r3)	18	a	47.6634	0.6511	15.1075	9.9117	0.172	11.1317	10.2096	1.6201	0.1605	0.1503	0.0613	0.1612	97.1721		39.0375	0.0236	n/d	0.2262	14.0126	0.1117	0.0041	44.91	0.0177	0.0107	0.1789	98.533	85.1028		85.1376	0.15	-9.2	0.412259	0.300827		49.9678	0.737007	17.1008	9.80578	0.194694	8.03604	11.5567	1.83386
					P950 (Mount 1 r3)		b	47.6551	0.7609	16.9892	10.3128	0.2022	6.9841	11.1986	1.936	0.2138	0.0514	0.0771	0.1856	96.7827		38.9584	0.0388	n/d	0.2369	13.8771	0.0982	0.0073	45.0111	0.0185	0.0078	0.1848	98.4391	85.2538		85.2312	0.15	4.6	0.245637	0.299461		48.818	0.749942	16.7445	10.8681	0.199288	8.97294	11.0373	1.90812
					P950 (Mount 1 r3)	19		47.4302	0.5878	14.7934	10.5653	0.1746	10.9684	9.8832	1.4882	0.1812	0.1098	0.0676	0.3469	96.9428		39.0896	0.0274	n/d	0.2178	14.2591	0.0629	0.0044	44.527	0.0237	0	0.1725	98.3843	84.7701		84.7657	0.15	-7.8	0.391121	0.299899		49.7857	0.658666	0	10.6195	0.19565	8.45334	11.0747	1.66762
					P950 (Mount 1 r3)	20	a	47.5639	0.6008	15.0461	10.2496	0.1979	11.1864	10.1035	1.6266	0.1653	0.0617	0.0612	0.1587	97.1801		39.5075	0.0274	n/d	0.2227	14.3082	0.134	0.0066	44.7665	0.0208	0	0.1771	99.1707	84.7949		84.8157	0.15	-9.2	0.41039	0.300482		49.8453	0.679867	17.0262	10.1581	0.223944	8.11746	11.4332	1.84067
					P950 (Mount 1 r3)		b	47.8776	0.6078	15.0503	10.6108	0.1685	11.2236	9.842	1.6105	0.1462	0.1094	0.056	0.1403	97.5905		39.2798	0.032	n/d	0.228	14.3466	0.0951	0.0056	44.9841	0.0268	0.0099	0.1766	99.1845	84.8229		84.8074	0.15	-8.4	0.396876	0.299639		49.8752	0.678857	16.8098	10.5502	0.188199	8.42538	10.9926	1.79878
					P950 (Mount 1 r3)	21		47.0422	0.6531	14.9459	11.4209	0.1892	10.6798	10.0993	1.4984	0.153	0.0809	0.0693	0.1481	97.1372		39.3529	0.0342	n/d	0.2229	14.1963	0.09	0.0066	45.1688	0.017	0.0063	0.1871	99.2821	85.0103		85.0195	0.15	-4.2	0.345765	0.300219		48.7904	0.701941	16.0636	11.643	0.203349	9.4533	10.8546	1.61045
				Single mafic enclave	P1342_M1_1	1		48.608	0.603	15.1525	9.9856	0.1948	11.3271	9.7639	1.6155	0.1544	0.0648	0.0705	0.1539	97.8475		39.0718	0.0247	0.0198	0.2103	13.9237	0.0951	0	44.9301	0.0116	0.003	0.229	98.5191	85.1889		85.1356	0.15	-9.6	0.413564	0.298737		50.6815	0.680025	17.088	9.80216	0.219683	8.03179	11.0111	1.82186
					P1342_M1_4a	4	a	48.1947	0.6473	14.9931	10.8667	0.2138	10.7513	9.704	1.4255	0.1886	0.0718	0.0658	0.1542	97.4307		39.3487	0.038	0.0151	0.204	13.642	0.108	0.0058	45.0797	0.0183	0	0.1332	98.5928	85.4863		85.4566	0.15	-4.8	0.352242	0.299285		49.9329	0.697866	16.1643	11.0145	0.230502	9.25917	10.4621	1.53686
					P1342_M1_4b		b	48.4152	0.6656	15.1159	9.771	0.1494	11.2219	9.589	1.5214	0.1531	0.0933	0.0693	0.1522	97.069		39.4966	0.012	0.0167	0.209	13.8257	0.1063	0	45.0426	0.0162	0.0044	0.1841	98.9137	85.3092		85.3458	0.15	-9.4	0.414736	0.300879		50.8871	0.755713	17.1624	9.66507	0.169627	8.0529	10.8872	1.72738
Okataina	Tarawera 1886 AD	1 km3	38°16'23.34"S 176°30'53.58"E	Scoria	Un50	1	a	47.8228	0.80506	16.437	9.50898	0.225999	7.24872	10.7463	1.94048	0.410274	0.104748	0.095538	0.1822	95.528		39.4379	0.004704	n/d	0.269317	16.8213	0.006608	n/d	42.8138	0	0	0.229386	99.57	81.94		n/d	n/d	n/d	n/d	n/d		50.0615	0.842748	17.2064	9.95412	0.236579	7.58806	11.2494	2.03132
					Un50		b	48.1564	0.817585	16.2813	9.67699	0.183549	7.34157	10.7339	1.99192	0.411277	0.141453	0.090036	0.197987	96.0239		39.4379	0.0013725	n/d	0.269317	16.8213	0.006608	n/d	42.8138	0	0	0.229386	99.57	81.94		n/d	n/d	n/d	n/d	n/d		50.1504	0.851439	16.9555	10.0777	0.191149	7.64556	11.1783	2.0744
					Un50	2		48.18	0.818092	16.2075	9.53053	0.1794	6.94165	10.8703	1.90264	0.405724	0.132645	0.106257	0.191354	95.4661		39.4392	0.0013725	n/d	0.276268	16.8629	0.0118335	n/d	42.981	-0.002617	0	0.218276	99.7882	81.959		n/d	n/d	n/d	n/d	n/d		50.4682	0.856945	16.9773	9.98316	0.18792	7.27133	11.3866	1.993
Okataina	Kaharoa (0.7 ka)	5 km3	38°16'23.34"S 176°30'53.58"E	Bulk mafic enclave	Kah1 (Mount 1)	1	a	45.5469	0.6306	13.9435	14.8684	0.2326	11.5713	9.6028	1.4418	0.3563	0.074	0.0728	0.200588	98.7418		39.1881	0.0218	0	0.2795	17.7687	0.0443	0	43.0896	0.0028	0.0056	0.1691	100.57	81.2117		81.2451	0.15	-7.6	0.377557	0.300658		46.6567	0.689643	15.249	14.8506	0.254378	9.20348	10.5019	1.5768
					Kah1 (Mount 1)		b	45.6667	0.6764	14.3893	16.3759	0.2637	10.4508	9.7405	1.4693	0.2666	0.0934	0.0683	0.190478	99.8416		39.5223	0.0272	0	0.2706	17.3471	0.0508	0	43.4349	0	0.0071	0.2048	100.865	81.695		81.6879	0.15	0	0.299857	0.299857		45.7011	0.676909	14.4001	16.3882	0.263899	10.4587	9.74783	1.47041
				Bulk mafic enclave	Kah 2 (Mount 1)	2		47.9325	0.7119	15.2349	14.1205	0.2346	9.4397	10.4729	1.6415	0.3527	0.0973	0.037	0.0682138	100.412		39.0548	0.0068	0	0.317	18.5657	0.0627	0	42.4557	0.0057	0.0056	0.1989	100.673	80.2996		80.3428	0.15	-3.8	0.343926	0.300822		47.9877	0.735179	15.7331	13.8739	0.242271	8.11242	10.8154	1.69518
					Kah 2 (Mount 1)	5		46.8241	0.865	14.7647	11.8052	0.2036	10.8524	11.2231	1.607	0.3051	0.1472	0.0824	0.200438	99.0803		39.9255	0.015	0.007	0.216	13.7367	0.046	0.0148	46.0651	0.0225	0.0057	0.2166	100.271	85.6678		85.6748	0.15	-2.2	0.322511	0.300171		47.424	0.892735	15.2381	11.8756	0.210128	10.1609	11.583	1.65853
					Kah 2 (Mount 1)	6		45.4899	0.6494	14.3102	13.6719	0.2124	10.276	10.6795	1.4636	0.2754	0.1064	0.0768	0.193481	97.598		39.9287	0.0071	0	0.2425	15.6291	0.0636	0.0212	45.0728	0.0104	0.0014	0.2147	101.192	83.7143		83.7432	0.15	-0.6	0.306617	0.300636		46.6356	0.66926	14.7478	13.9948	0.218896	10.3135	11.0061	1.50836
					Kah 2 (Mount 1)	8		48.5745	0.6274	15.0229	10.7374	0.1484	10.5787	11.4414	1.732	0.5606	0.1275	0.0727	0.129121	99.8815		39.3871	0.0188	0	0.1841	13.8971	0.0826	0.0178	46.1263	0.0147	0.0122	0.2596	100	85.5411		85.5499	0.15	-4.4	0.349213	0.300214		48.9978	0.656198	15.7125	10.6078	0.155212	8.98459	11.9666	1.8115
					Kah 2 (Mount 1)	12		47.4601	0.6934	14.0012	11.0603	0.2028	11.0166	11.3402	1.4294	0.2186	0.1021	0.0697	0.172211	97.9386		39.8713	0.0334	0	0.2029	13.6582	0.0509	0	45.7566	0.0186	0	0.222	99.8138	85.6556		85.6759	0.15	-4.6	0.349785	0.300496		48.8614	0.74209	14.9844	11.1765	0.21704	9.56365	12.1365	1.52977
					Kah 2 (Mount 1 r2)	13		46.5142	0.647	13.8715	12.6091	0.1961	10.9934	10.088	1.525	0.3351	0.0955	0.0646	0.1961	97.3313		39.5159	0.0174	0	0.2331	14.7962	0.071	0	44.776	0.0068	0.0049	0.1997	99.6208	84.3603		84.3608	0.15	-3.8	0.338949	0.300011		48.1027	0.69122	14.8196	12.8784	0.209503	9.93833	10.7775	1.62923
					Kah 2 (Mount 1 r2)	14	a	47.95	0.6268	13.5959	9.6524	0.1821	12.0677	10.1753	1.6061	0.3387	0.1101	0.0737	0.1228	96.624		39.5204	0.0417	0	0.2164	13.9166	0.0523	0.0191	45.7862	0.0138	0	0.2214	99.7879	85.4319		85.4587	0.15	-12.2	0.447063	0.300649		50.912	0.736235	15.9697	9.46015	0.213893	7.95387	11.9518	1.88651
					Kah 2 (Mount 1 r2)		a	48.1833	0.604	13.739	9.6933	0.2006	11.8927	10.3709	1.5484	0.3274	0.0982	0.0606	0.134	96.9863		39.5204	0.0417	0	0.2164	13.9166	0.0523	0.0191	45.7862	0.0138	0	0.2214	99.7879	85.4319		85.4114	0.15	-11.6	0.438721	0.299508		50.9071	0.702147	15.9715	9.4964	0.233196	7.95404	12.0561	1.80001
					Kah 2 (Mount 1 r2)		b	47.575	0.6483	14.5043	10.6788	0.1757	8.9087	11.2966	1.618	0.327	0.1183	0.0793	0.1799	96.2894		39.4719	0.0214	0	0.2242	13.7095	0.0749	0	45.7422	0.014	0.0098	0.1916	99.4596	85.6056		85.6457	0.15	0.6	0.294156	0.300979		49.3503	0.669097	14.9696	11.1072	0.181336	9.48103	11.659	1.66991
					Kah 2 (Mount 1 r2)	15		46.0565	0.6066	14.4474	10.9139	0.1789	12.3668	10.3839	1.2933	0.1367	0.2246	0.0591	0.0731	96.8138		39.9662	0.0308	0.006	0.2447	13.9769	0.0297	0	45.6089	0.0078	0.0042	0.1618	100.037	85.3295		85.3509	0.15	-10	0.408526	0.300514		48.3476	0.694277	16.5356	10.9651	0.204758	9.13978	11.8848	1.48023
				Bulk mafic enclave	Kah 2 (Mount 2)	5		46.3357	0.6383	13.9398	12.5294	0.2143	11.9707	10.1303	1.4821	0.2963	0.0867	0.0736	0.173963	98.0447		39.3227	0.0393	0.0143	0.2129	15.8967	0.0639	0	44.5946	0.0109	0.003	0.1882	100.347	83.3339		83.3638	0.15	-9.4	0.400678	0.300646		48.0158	0.716611	15.65	12.4782	0.240592	8.94544	11.3731	1.66393
					Kah 2 (Mount 2)	6		47.2893	0.6371	13.8641	12.6309	0.2176	11.5419	10.2811	1.3546	0.2673	0.1062	0.0728	0.191679	98.6461		39.3227	0.0393	0.0143	0.2129	15.8967	0.0639	0	44.5946	0.0109	0.003	0.1882	100.347	83.3339		83.6084	0.15	-7.2	0.375903	0.300184		48.5594	0.694838	15.1206	12.5983	0.23732	9.19325	11.2128	1.47736
					Kah 2 (Mount 2)	9		47.5312	0.6391	13.5567	12.5668	0.2059	10.2402	11.996	1.4049	0.1722	0.0944	0.0745	0.175564	98.8327		39.6112	0.0298	0	0.2393	15.6608	0.013	0.0062	44.8959	0	0.0088	0.2315	100.697	83.6329		83.6311	0.15	-3.2	0.334404	0.299959		48.3542	0.66778	14.1651	12.6204	0.21514	9.22455	12.5343	1.46795
					Kah 2 (Mount 2)	10		46.3627	0.6925	14.8155	12.3576	0.2059	9.4168	11.4988	1.5528	0.2959	0.1205	0.0823	0.209796	97.8206		39.6568	0.032	0.0122	0.2256	15.4324	0.0822	0	45.1771	0.0077	0.0138	0.1784	100.818	83.9175		83.9038	0.15	-0.6	0.306242	0.299696		47.4448	0.712326	15.2397	12.6175	0.211795	9.4093	11.828	1.59725
					Kah 2 (Mount 2 r2)	11	a	46.2908	0.6261	13.4737	12.6139	0.2371	11.6872	9.9824	1.3765	0.2476	0.084	0.0734	0.1876	97.0676		39.3037	0.024	0.0089	0.2832	15.8667	0.0648	0	43.9685	0.0037	0.0119	0.2193	99.7547	83.1631		83.1158	0.15	-8.8	0.393357	0.298989		48.4517	0.706401	15.2018	12.7187	0.267509	8.95721	11.2627	1.55304
					Kah 2 (Mount 2 r2)		a	46.0076	0.6506	13.6466	12.6512	0.2195	10.5107	10.3428	1.481	0.2533	0.0946	0.0743	0.1932	96.3182		39.3037	0.024	0.0089	0.2832	15.8667	0.0648	0	43.9685	0.0037	0.0119	0.2193	99.7547	83.1631		83.1844	0.15	-4.8	0.352717	0.300456		48.1777	0.710024	14.8931	12.9925	0.239549	9.19491	11.2875	1.61627
				Bulk mafic enclave	Kah 2 (Mount 3)	3		45.5919	0.6562	13.547	11.7424	0.17	11.6651	9.7261	1.536	0.3457	0.0882	0.0766	0.1825	95.5098		38.9837	0.0167	0.0056	0.2714	15.0946	0.0571	0	44.3885	0.0077	0	0.1893	99.0146	83.9784		84.0181	0.15	-8.8	0.397433	0.300886		48.5075	0.753676	15.5594	12.0157	0.195253	9.0369	11.1709	1.76417
Okataina	Okareka (21.9 ka)	8 km3	38°12'28.04"S 176°38'9.13"E	Scoria	Okareka (Mount 1)	1		47.8631	0.9074	15.5968	14.4013	0.2269	7.8168	9.0953	1.7435	0.4258	0.1914	0.0936	0.1664	98.6943		38.6161	0.0221	0	0.2544	18.8428	0.0363	0	40.8255	0	0.0048	0.1787	98.7809	79.4319		79.401	0.15	0.4	0.294729	0.299433		48.4212	0.914985	15.7272	14.5994	0.228797	8.05079	9.17133	1.75807
					Okareka (Mount 1)	3		50.5036	0.8758	14.9603	12.7269	0.1922	8.305	8.7222	2.2026	0.6578	0.1885	0.099	0.148	99.7297		38.9563	0.0311	0.0027	0.2866	17.1744	0.0518	0	42.2683	0.0095	0.0015	0.1652	98.9474	81.4361		81.4282	0.15	-1	0.311936	0.299843		50.7222	0.886482	15.1428	12.7067	0.194544	7.97041	8.82859	2.22947
					Okareka (Mount 1)	6		47.2544	0.8116	14.6679	14.8009	0.2552	9.665	8.5397	1.6032	0.4698	0.1847	0.0799	0.1573	98.6466		38.5156	0.0113	0.0127	0.3156	19.1376	0.0542	0.0034	40.7749	0.0083	0.0151	0.1754	99.0239	79.1566		79.1239	0.15	-5.4	0.36057	0.299405		48.3651	0.868442	15.6952	14.7478	0.273073	7.9967	9.13779	1.71548
					Okareka (Mount 1)	7		48.4439	0.8874	15.4961	12.3632	0.2506	8.8988	9.8367	1.8762	0.4306	0.1846	0.09	0.1965	99.1507		39.2827	0.0174	0	0.2825	16.5354	0.0646	0	42.7127	0.0214	0	0.1816	99.0983	82.1563		82.1176	0.15	-2.4	0.327823	0.299209		49.0864	0.91693	16.0118	12.3631	0.258939	8.12204	10.164	1.93864
					Okareka (Mount 1)	8		47.9823	0.8165	14.4099	12.3235	0.1638	10.268	8.64	1.8478	0.4513	0.1651	0.088	0.1584	97.4728		38.4974	0.0335	0.002	0.2837	18.2088	0.0162	0.05	41.402	0.0101	0.0036	0.1797	98.687	80.2089		80.1833	0.15	-10.4	0.431115	0.299516		50.3489	0.932095	16.45	11.9861	0.18699	6.93834	9.8632	2.1094
					Okareka (Mount 1)	9		47.0289	0.8102	14.4475	14.1412	0.2011	9.8733	8.7345	1.8393	0.4063	0.232	0.0924	0.1566	98.1197		38.3817	0.0316	0	0.3514	18.6223	0.0716	0.0047	41.1147	0	0.0112	0.1745	98.7637	79.7378		79.7821	0.15	-6.2	0.372043	0.300824		48.474	0.879127	15.6766	14.113	0.218208	7.96736	9.47758	1.99578
					Okareka (Mount 1)	10		47.6882	0.8108	14.611	13.2334	0.2148	10.0924	9.2486	1.7653	0.4037	0.1584	0.085	0.1676	98.6465		38.4783	0.0374	0	0.3107	18.4607	0.0177	0.0086	40.9698	0.0012	0.0063	0.1709	98.4617	79.8214		79.8372	0.15	-8.6	0.404286	0.300294		49.1678	0.896689	16.1588	12.9219	0.237554	7.31994	10.2283	1.9523
					Okareka (Mount 1)	11		46.9812	0.7963	14.5521	13.2443	0.2319	9.6698	9.7795	1.6789	0.3356	0.1681	0.0914	0.1886	97.9059		38.6966	0.0313	0.0104	0.2468	18.013	0.0926	0	41.8441	0.0155	0.0004	0.1882	99.1388	80.547		80.6063	0.15	-5.8	0.369761	0.301139		48.512	0.862933	15.7698	13.2424	0.251305	7.87407	10.5978	1.81939
					Okareka (Mount 1)	12		49.0261	0.9153	14.979	13.3004	0.2177	10.0242	9.1198	1.598	0.4385	0.1807	0.0827	0.114	100.11		39.0762	0.0462	0.024	0.2725	16.597	0.0641	0.0005	42.9539	0.012	0	0.173	99.2194	82.1843		82.2296	0.15	-3.8	0.342605	0.30093		49.2886	0.948756	15.5265	13.1383	0.225657	8.69755	9.45315	1.65641
					Okareka (Mount 1 r2)	13	a	47.4412	0.8236	14.1549	12.8342	0.2133	10.1923	8.9087	1.8451	0.4955	0.1934	0.161	0.1684	97.5998		39.4919	0.041	0.0053	0.2919	17.7896	0.05	0	42.657	0.014	0.0056	0.1864	100.533	81.0392		81.0226	0.15	-7.6	0.389637	0.299677		49.3477	0.91212	15.6763	12.7745	0.236225	7.8026	9.8662	2.04341
					Okareka (Mount 1 r2)		a	46.9783	0.808	14.2881	12.8403	0.2011	10.169	9.0889	1.8817	0.4661	0.1657	0.0876	0.1741	97.3227		39.4919	0.041	0.0053	0.2919	17.7896	0.05	0	42.657	0.014	0.0056	0.1864	100.533	81.0392		81.0934	0.15	-7.4	0.388562	0.301061		48.9682	0.895798	15.8407	12.8314	0.222952	7.87354	10.0765	2.08617
					Okareka (Mount 1 r2)	14	a	47.1667	0.8285	14.6095	12.3434	0.218	10.2149	9.6265	1.7334	0.4313	0.1461	0.0721	0.1864	97.7629		39.5535	0.04	0	0.2845	17.2541	0.0536	0.019	42.9644	0.0179	0.0122	0.1835	100.383	81.6124		81.6187	0.15	-7.6	0.390988	0.300126		48.9615	0.916149	16.1551	12.2524	0.241063	7.78322	10.6449	1.91678
					Okareka (Mount 1 r2)		a	47.8136	0.8233	14.5485	12.1239	0.1897	10.3607	9.5025	1.77	0.383	0.1591	0.1345	0.1942	98.1968		39.5535	0.04	0	0.2845	17.2541	0.0536	0.019	42.9644	0.0179	0.0122	0.1835	100.383	81.6124		81.5879	0.15	-8.6	0.403749	0.299511		49.5502	0.915497	16.1777	11.9	0.210943	7.54387	10.5666	1.96821
					Okareka (Mount 1 r2)	15	a	47.1599	0.6777	16.4691	10.7843	0.1749	10.1918	10.1936	1.6234	0.3687	0.1521	0.0737	0.1259	98.1206		38.7377	0.0289	0	0.2863	16.809	0.0249	0.0201	42.8194	0.0231	0.0105	0.1988	98.9587	81.9514		82.0088	0.15	-10.2	0.436457	0.301169		48.9908	0.766304	18.6223	10.3344	0.197767	6.7393	11.5263	1.83565
					Okareka (Mount 1 r2)		a	47.7917	0.6775	16.4512	10.6828	0.1988	10.1944	10.1475	1.6712	0.3771	0.1363	0.0625	0.1351	98.661		38.7377	0.0289	0	0.2863	16.809	0.0249	0.0201	42.8194	0.0231	0.0105	0.1988	98.9587	81.9514		82.0339	0.15	-10.4	0.440716	0.301681		49.4299	0.763074	18.5291	10.1452	0.22391	6.62713	11.4292	1.88229
Inter-caldera scoria	Ongaroto	<0.1 km3	38°23'10.03"S 175°56'25.32"E	Lava	Onga 1 (Mount 1)	2		50.0564	1.2623	15.901	8.7692	0.1196	9.8905	10.1446	2.6979	0.6299	0.3639	0.1455	0.1205	100.222		40.0069	0.0414	0	0.1623	12.6304	0.3141	0	46.203	0.0337	0	0.1842	99.5762	86.7026		86.7005	0.15	-5	0.362732	0.299944		50.4336	1.32381	16.6758	8.54239	0.125428	7.96694	10.6389	2.82936
					Onga 1 (Mount 1)	3		50.4932	1.2311	14.4867	10.817	0.1776	9.5284	9.6609	2.4832	0.5438	0.3756	0.1315	0.1482	100.225		40.105	0.049	0.013	0.2192	14.3335	0.2546	0.0143	44.7778	0.0218	0.0085	0.1671	99.9639	84.7754		84.7287	0.15	-2.8	0.331729	0.298917		50.6625	1.26285	14.8603	10.6852	0.18218	8.48131	9.91003	2.54724
					Onga 1 (Mount 1)	5		50.4143	1.2735	15.6169	9.4888	0.1472	9.7505	9.4801	2.9029	0.6249	0.3749	0.1386	0.1122	100.437		39.8328	0.0438	0	0.1794	12.7392	0.2741	0.0093	46.0259	0.0445	0.0118	0.1507	99.3113	86.5588		86.5218	0.15	-3	0.334608	0.299048		50.4767	1.30592	16.0145	9.33881	0.150947	8.57652	9.72145	2.9768
					Onga 1 (Mount 2)	1	a	48.3962	1.0878	16.0656	8.4654	0.101	11.0077	10.8517	2.431	0.4999	0.2285	0.1126	0.1769	99.6435		40.0009	0.0331	n/d	0.1499	10.5697	0.3556	0	48.1089	0.0568	0.0135	0.1867	99.4751	89.0266		89.0669	0.15	-3.2	0.336099	0.301243		48.8706	1.12835	16.6644	8.43122	0.104765	9.82627	11.2562	2.52161
					Onga 1 (Mount 2)		b	49.8031	1.1989	16.243	7.086	0.1752	10.1405	10.7346	2.7706	0.5802	0.409	0.1306	0.0967	99.5032		39.2816	0.0227	n/d	0.2328	13.4361	0.3047	0.0065	45.1734	0.0415	0.0028	0.2025	98.7047	85.6994		86.7797	0.15	-11	0.50076	0.328605		51.2405	1.34657	18.2436	6.35939	0.196779	5.97198	12.0568	3.11185
					Onga 1 (Mount 2)	2		47.0439	1.1094	15.9248	10.8702	0.1966	9.9899	10.6054	2.5338	0.4342	0.3432	0.1005	0.1547	99.4873		39.5603	0.0195	n/d	0.211	12.6869	0.2493	0.0073	46.0954	0.0382	0.0109	0.1935	99.0721	86.6241		86.6112	0.15	0.2	0.297579	0.299666		47.2716	1.11286	15.9745	10.93	0.197214	10.1153	10.6385	2.54171
					Onga 1 (Mount 2)	4		49.584	1.201	17.4457	7.3265	0.0752	10.3775	10.8337	2.5242	0.5942	0.3354	0.118	0.0997433	100.615		40.7366	0.0827	0.0213	0.1185	10.4181	0.274	0.0081	48.6886	0.0773	0.0071	0.1373	100.57	89.2821		89.2917	0.15	-4.6	0.356565	0.300301		49.6756	1.24937	18.1484	7.13193	0.0782289	8.50789	11.2701	2.62587
					Onga 1 (Mount 2)	7		48.5879	1.3591	16.7617	9.9354	0.1633	11.5351	9.757	1.4414	0.5312	0.3133	0.0549	0.075921	100.592		40.4714	0.0444	0.0044	0.1953	12.0846	0.3025	0.0023	47.4868	0.0431	0.0002	0.1629	100.798	87.5065		87.4866	0.15	-4.6	0.347597	0.299456		48.6316	1.41321	17.429	9.76641	0.169802	9.76849	10.1455	1.49879
				Lava	Onga 2 (Mount 1)	2		49.4399	1.1401	17.053	7.4993	0.1208	10.1135	11.4946	2.285	0.4892	0.2643	0.1195	0.1155	100.25		40.2346	0.0487	0.0102	0.1698	11.8029	0.2877	0	46.878	0.0269	0.0049	0.1857	99.6492	87.6228		87.5908	0.15	-7.4	0.399468	0.299117		50.0018	1.22455	18.3161	7.13832	0.129748	7.20837	12.346	2.45425
					Onga 2 (Mount 1)	4	a	48.3059	1.2833	17.0904	8.4135	0.1399	10.4168	11.5288	2.0675	0.4644	0.3156	0.1031	0.1068	100.343		40.0745	0.0411	0.0022	0.1911	11.8427	0.2615	0	46.7152	0.0393	0.0148	0.182	99.3643	87.5484		87.5737	0.15	-5.6	0.369259	0.3007		48.5741	1.35209	18.0065	8.17405	0.147399	8.24133	12.1468	2.17833
					Onga 2 (Mount 1)		b	48.8774	1.2013	16.8811	8.1767	0.1092	10.3469	10.831	2.4194	0.4855	0.3626	0.1206	0.1292	100.07		40.0523	0.0421	0	0.2174	12.3027	0.2451	0	46.4711	0.0166	0.0109	0.2238	99.5821	87.0681		87.0987	0.15	-7.2	0.394122	0.300819		49.4836	1.29023	18.1308	7.85233	0.117284	7.58411	11.6328	2.59851
					Onga 2 (Mount 1)	5	a	50.2744	1.2036	16.1538	7.2211	0.0851	10.0817	11.282	2.5839	0.6196	0.311	0.1336	0.1001	100.15		40.2225	0.034	0.0271	0.1546	11.6002	0.3547	0.0334	46.9779	0.0406	0.0079	0.1923	99.6451	87.8322		87.8525	0.15	-7.6	0.405586	0.30057		50.9654	1.29658	17.4017	6.85076	0.0916743	7.08812	12.1536	2.78352
					Onga 2 (Mount 1)		b	51.8028	1.2078	14.8346	8.3184	0.1348	9.8494	10.3324	2.7499	0.6014	0.3814	0.1411	0.105	100.564		40.4258	0.024	0.0167	0.1485	11.3469	0.332	0	47.1031	0.0412	0.0047	0.1815	99.6246	88.0941		88.0757	0.15	-3	0.335567	0.299474		51.8315	1.23708	15.1943	8.17064	0.138068	8.63389	10.5829	2.81657
				Lava	Onga 3 (Mount 1)	2	a	48.4484	1.2173	16.6866	9.0694	0.1779	10.5586	11.1037	2.2224	0.4199	0.2897	0.0882	0.1088	100.499		39.6967	0.0625	0	0.1658	12.0621	0.2539	0.0011	46.8227	0.0408	0.0079	0.1686	99.2823	87.3722		87.3559	0.15	-4.6	0.352838	0.299556		48.5581	1.26761	17.3762	8.87338	0.185252	8.77041	11.5626	2.31424
					Onga 3 (Mount 1)		b	50.056	1.0052	17.0459	6.7474	0.0905	10.2516	11.7013	2.5017	0.5955	0.2338	0.1394	0.1417	100.651		40.1087	0.0291	0	0.1542	9.8775	0.3542	0.0027	48.7467	0.047	0.0143	0.1684	99.5029	89.7923		89.839	0.15	-4.8	0.362191	0.301536		50.189	1.04793	17.7705	6.54536	0.0943471	8.27922	12.1987	2.60805
					Onga 3 (Mount 1)	3		50.736	1.1999	15.344	10.0122	0.1443	10.2262	9.4252	2.5632	0.7252	0.2935	0.1043	0.0718	100.917		39.6531	0.0442	0.0083	0.1868	11.1846	0.3366	0.0224	47.7983	0.0622	0.013	0.1745	99.4839	88.3956		88.3568	0.15	1.8	0.281173	0.298871		50.0537	1.16683	14.9212	9.94031	0.140323	10.7918	9.16546	2.49256
					Onga 3 (Mount 1)	6		49.0822	1.1088	16.8942	8.4175	0.1329	10.2183	10.8112	2.3794	0.501	0.3326	0.1212	0.1048	100.209		40.415	0.0615	0.0009	0.1866	9.7898	0.3678	0.0119	48.8232	0.0532	0.0119	0.2233	99.945	89.888		89.9101	0.15	1.4	0.286368	0.30073		48.8477	1.09072	16.6187	8.41991	0.130733	10.7338	10.6349	2.3406
					Onga 3 (Mount 1)	8		49.3743	1.1179	17.2059	8.2701	0.1075	10.187	11.1771	2.4271	0.4038	0.2737	0.1266	0.1167	100.904		39.869	0.053	0.0305	0.191	10.9375	0.2683	0	47.668	0.0466	0.006	0.195	99.2646	88.5952		88.595	0.15	-2.8	0.332512	0.299994		49.159	1.1389	17.5292	8.11341	0.10952	9.01662	11.3871	2.4727
					Onga 3 (Mount 1)	10		49.1375	1.1007	16.2451	9.4083	0.1546	10.3428	10.3507	2.447	0.4955	0.2955	0.0938	0.1338	100.339		39.8582	0.0452	0	0.2084	11.7295	0.2525	0	47.082	0.0466	0.0108	0.2217	99.455	87.7371		87.7453	0.15	-2	0.322205	0.300229		49.134	1.11887	16.5133	9.32476	0.157153	9.5518	10.5216	2.4874
					Onga 3 (Mount 1)	11		49.2855	1.1972	16.2125	8.2307	0.126	10.9343	10.9717	2.4461	0.4411	0.2829	0.1077	0.1111	100.458		40.2986	0.0615	0.0071	0.1468	10.0689	0.3023	0	48.6116	0.0416	0.0057	0.2215	99.7657	89.5892		89.5942	0.15	-2.2	0.323726	0.30016		49.234	1.21788	16.4926	8.1472	0.128177	10.0355	11.1613	2.48836
					Onga 3 (Mount 1)	13		48.1399	1.2738	16.9143	8.5781	0.1019	10.2355	10.1734	2.7666	0.5651	0.3888	0.1222	0.1296	99.5185		39.7889	0.0404	0	0.1737	10.3443	0.3739	0.0144	48.1801	0.0551	0.0094	0.1274	99.1078	89.2496		89.2939	0.15	0	0.301393	0.301393		48.3661	1.27978	16.9938	8.6184	0.102379	10.2836	10.2212	2.7796
					Onga 3 (Mount 1)	14	a	48.4595	1.1111	16.8467	7.7969	0.1222	10.4521	11.9205	2.2009	0.4721	0.2372	0.1238	0.1004	99.9436		39.585	0.0449	0	0.1542	10.7036	0.2343	0	48.2696	0.0339	0.0077	0.2413	99.2744	88.9358		88.9297	0.15	-4.2	0.349719	0.299812		48.8129	1.15923	17.5765	7.67188	0.127494	8.81684	12.4369	2.29624
					Onga 3 (Mount 1)		b	48.9087	1.0784	17.1664	7.1741	0.1103	10.2488	11.9134	2.331	0.4845	0.2339	0.1259	0.2908	100.356		40.159	0.0601	0.0104	0.1597	9.3406	0.3458	0.0005	49.3776	0.069	0.0112	0.153	99.687	90.4054		90.3969	0.15	-1.6	0.31793	0.299704		48.9471	1.09378	17.4112	7.12424	0.111873	9.59413	12.0833	2.36424
					Onga 3 (Mount 1)	16		48.4157	1.1517	16.9852	8.0875	0.1258	10.1579	11.335	2.4886	0.5581	0.3244	0.1238	0.1276	100.008		39.2001	0.0187	0.0144	0.1397	10.9759	0.3378	0	47.86	0.0501	0.0037	0.1841	98.7846	88.6004		88.6342	0.15	-3.2	0.338874	0.301006		48.6657	1.18907	17.5364	7.98941	0.129882	8.91335	11.7028	2.56935
					Onga 3 (Mount 1)	17		48.0489	1.148	16.8695	8.087	0.1398	10.3794	11.332	2.4106	0.4892	0.2793	0.1126	0.1652	99.6264		39.5934	0.0531	0.0004	0.1959	12.0682	0.2111	0.0005	47.4238	0.043	0.0086	0.1606	99.7585	87.5068		87.5173	0.15	-6.6	0.384248	0.300289		48.7889	1.23191	18.1025	7.85096	0.150018	7.87472	12.1603	2.5868
					Onga 3 (Mount 1)	18		48.0205	1.133	16.6107	9.3189	0.1207	10.5872	11.1221	1.9579	0.3918	0.2474	0.1039	0.1413	99.8966		39.4202	0.0409	0	0.2016	11.5245	0.213	0	47.418	0.0302	0.0059	0.1658	99.02	88.0008		88.0355	0.15	-2.2	0.324845	0.300989		48.2346	1.15934	16.9969	9.27658	0.123506	9.76516	11.3807	2.00342
					Onga 3 (Mount 1)	19		47.1896	1.1063	16.2423	10.1997	0.1742	10.0575	11.0575	2.2191	0.3935	0.2691	0.0998	0.1528	99.3139		39.2213	0.0429	0	0.2397	12.7593	0.215	0	46.3862	0.0256	0.0139	0.1975	99.1014	86.631		86.6015	0.15	-1.8	0.319096	0.299236		47.642	1.13418	16.6517	10.2216	0.178591	9.45181	11.3362	2.27503
					Onga 3 (Mount 1)	20		47.8297	1.1119	16.0598	10.0649	0.1495	10.1802	10.5638	2.2934	0.5065	0.2936	0.1136	0.1446	99.4556		38.9517	0.0307	0	0.1383	12.3988	0.2355	0.0031	46.5482	0.0494	0.0018	0.1415	98.499	86.999		86.9813	0.15	-1.6	0.31696	0.29953		48.2078	1.1359	16.4065	10.079	0.152728	9.63386	10.7919	2.34291
					Onga 3 (Mount 1 r2)	21		48.1888	1.0844	15.7521	9.0837	0.152	10.7658	10.6903	2.3807	0.484	0.3649	0.1169	0.1763	99.4478		39.9544	0.0369	n/d	0.1612	11.0733	0.2777	0.0068	47.0541	0.033	0.0134	0.2107	98.8216	88.337		88.3375	0.15	-2.6	0.328129	0.300012		48.6973	1.12005	16.27	9.08205	0.156998	9.8415	11.0418	2.45898
					Onga 3 (Mount 1 r3)	22		48.6506	1.1283	16.1659	9.0059	0.1211	10.117	10.7956	2.6214	0.5129	0.3051	0.1021	0.126	99.8364		39.9874	0.0302	n/d	0.1932	11.0685	0.2655	0.0065	47.0355	0.0633	0.0013	0.1794	98.8308	88.3374		88.3378	0.15	-1	0.311006	0.300011		48.8308	1.14196	16.3616	9.00083	0.122566	9.75385	10.9263	2.65313
					Onga 3 (Mount 1 r3)	14		48.8976	1.08	16.4283	8.0049	0.1194	10.6331	11.4426	2.4217	0.4738	0.3512	0.1159	0.1178	100.285		39.9782	0.0347	n/d	0.1743	11.1131	0.3172	0	47.3075	0.0682	0.0015	0.1759	99.1706	88.3554		88.3366	0.15	-5.6	0.367105	0.299452		49.2706	1.13976	17.3374	7.79795	0.126007	8.44931	12.0758	2.55571
					Onga 3 (Mount 1 r3)	23		48.8954	1.079	16.0724	8.0052	0.1726	10.4921	11.2866	2.5426	0.4959	0.2958	0.1188	0.1504	99.8193		40.0898	0.0324	n/d	0.1626	10.9667	0.3327	0.0063	47.0414	0.0484	0	0.1841	98.8646	88.4336		88.4087	0.15	-5	0.359474	0.299272		49.4637	1.13761	16.9454	7.86221	0.181975	8.57893	11.8997	2.68071
				Lava	Onga 4 (Mount 1)	1		48.5246	1.149	16.4455	9.047	0.1852	10.0224	10.8137	2.4513	0.5	0.3927	0.1145	0.1245	99.8949		39.9252	0.0359	0.0004	0.1838	10.8529	0.2831	0.0025	47.6407	0.0451	0.0089	0.1675	99.1459	88.6677		88.6355	0.15	0.2	0.296904	0.299042		48.5466	1.1476	16.4254	9.05807	0.184974	10.1069	10.8005	2.44831
					Onga 4 (Mount 1)	2		47.8276	1.119	16.3664	10.2993	0.1693	10.6074	10.7616	2.1716	0.4558	0.3085	0.114	0.1554	100.511		39.6163	0.0483	0.0205	0.1866	12.1122	0.2642	0.0082	46.8414	0.0476	0.0104	0.2007	99.3562	87.3309		87.3619	0.15	-1.2	0.313311	0.300843		47.6644	1.12654	16.4766	10.2217	0.17044	10.1086	10.8341	2.18623
					Onga 4 (Mount 1)	3		48.1205	1.1587	16.4589	10.2739	0.1531	10.1374	10.7015	2.2534	0.4557	0.3346	0.1095	0.1529	100.463		39.6956	0.0344	0	0.1987	12.2571	0.2793	0	46.7145	0.0321	0.0142	0.1618	99.3877	87.1684		87.1814	0.15	-0.4	0.304585	0.300348		47.9204	1.15776	16.4456	10.2162	0.152976	9.94025	10.6928	2.25158
					Onga 4 (Mount 1)	5		47.4906	1.0952	15.9656	10.5979	0.167	10.2504	10.3485	2.2927	0.4444	0.3043	0.1106	0.1798	99.4264		39.9539	0.0254	0.0018	0.2137	12.7548	0.2367	0.0227	46.2074	0.0349	0.0061	0.1812	99.6386	86.5903		86.5576	0.15	-1.4	0.314097	0.299157		47.8741	1.11722	16.2867	10.6281	0.170358	9.79068	10.5566	2.3388
					Onga 4 (Mount 1)	6		47.1752	1.1223	16.0408	10.7935	0.1765	10.2277	10.3839	2.3621	0.456	0.3043	0.1064	0.1827	99.5136		39.7209	0.0271	0.0188	0.2008	12.2056	0.2109	0.0013	46.0975	0.0288	0.0026	0.2254	98.7397	87.0664		87.0379	0.15	0.4	0.295174	0.299242		47.3779	1.12327	16.0547	10.8531	0.176653	10.4259	10.3929	2.36415
					Onga 4 (Mount 1)	8		48.6782	1.1462	16.7767	9.8348	0.1518	9.7841	9.5503	2.6047	0.5977	0.2904	0.1081	0.1174	99.7575		40.2118	0.0399	0	0.2093	11.778	0.3058	0	46.6184	0.038	0.0038	0.1698	99.3749	87.5854		87.5851	0.15	0.4	0.2957	0.299992		48.7397	1.14384	16.7421	9.86267	0.151487	9.95428	9.53062	2.59933
Inter-caldera scoria	Harry Johnson Road	<0.1 km3	38°17'32.33"S 176° 6'40.45"E	Scoria	HJ 4 (Mount 1)	1	a	46.2928	1.1414	14.3976	17.0067	0.2503	7.7822	8.5389	1.9705	0.8358	0.2165	0.0717	0.2904	99.0847		38.6256	0.0254	0	0.3178	18.6892	0.0845	0.007	40.9923	0.0066	0.0186	0.1898	98.9569	79.6315		79.5811	0.15	5.6	0.245444	0.299071		46.2837	1.0885	13.7303	17.3335	0.238699	9.66477	8.14314	1.87917
					HJ 4 (Mount 1)		b	47.8564	1.1257	14.8355	16.4287	0.2395	7.4215	8.3807	1.9459	1.0904	0.195	0.0714	0.2302	100.077		39.1989	0.0262	0	0.295	19.4919	0.0553	0	40.6804	0.005	0.0113	0.1775	99.9414	78.8136		78.8176	0.15	4.4	0.254647	0.300071		47.4161	1.07609	14.1816	16.5968	0.228944	8.83485	8.01132	1.86013
					HJ 4 (Mount 1)	3		46.1292	1.1491	15.7887	11.9541	0.19	9.0076	10.5926	2.2869	0.3369	0.1857	0.073	0.216	98.1544		39.2773	0.046	0	0.2716	16.0629	0.058	0.0062	43.0061	0.0094	0.0041	0.2069	98.9485	82.6756		82.6746	0.15	-2.6	0.331106	0.299978		47.2213	1.20284	16.5271	12.0742	0.198886	8.24273	11.088	2.39385
Inter-caldera scoria	Tatua	<0.1 km3	38°30'30.64"S 176° 5'38.78"E	Lava	Tat 1 (Mount 1)	3		47.7047	1.0916	16.9595	12.1024	0.2198	8.9402	10.9611	2.2382	0.3937	0.1656	0.0736	0.189127	101.228		38.6384	0.0377	0	0.276	19.0222	0.0666	0.0133	41.6806	0.0037	0.0075	0.1865	99.9325	79.6151		79.6045	0.15	-7.2	0.396628	0.299804		47.7221	1.15804	17.9917	11.4409	0.233178	6.38835	11.6282	2.37443
Inter-caldera scoria	Punatekahi	<0.1 km3	38°40'35.84"S 176° 1'38.62"E	Scoria	Pun 5 (Mount 1)	1		46.2004	1.1396	15.8434	12.5819	0.2143	9.2739	11.2664	2.1888	0.3572	0.1536	0.0635	0.182821	99.6483		39.1277	0.0153	0	0.2961	17.7422	0.0451	0	42.6	0.0204	0.0055	0.2673	100.12	81.0596		81.0643	0.15	-5	0.361156	0.300092		46.7192	1.2024	16.7165	12.3625	0.226109	7.57146	11.8872	2.30942
					Pun 5 (Mount 1)	2		46.7982	1.0433	16.5995	12.1013	0.1932	9.2253	10.9678	2.3017	0.4339	0.1661	0.077	0.217954	100.343		38.9032	0.0194	0.0052	0.2714	18.8148	0.0524	0	41.5041	0.0005	0.0127	0.1831	99.7669	79.7239		79.7213	0.15	-8	0.406573	0.29995		47.2831	1.12663	17.9253	11.5005	0.208631	6.46806	11.8438	2.48554
					Pun 5 (Mount 1)			47.2904	1.098	17.2018	10.841	0.1538	9.2247	11.2209	2.3461	0.448	0.1603	0.0868	0.174063	100.42		38.5596	0.0287	0	0.2572	18.9999	0.071	0.0193	41.8417	0.0092	0.0055	0.2313	100.023	79.6966		79.7923	0.15	-10.4	0.454575	0.301782		47.9764	1.2132	19.0065	9.91611	0.169936	5.60159	12.3981	2.59224
					Pun 5 (Mount 1)	4		48.1595	1.2504	16.1369	12.3495	0.1635	8.8689	9.4785	2.6912	0.5261	0.2099	0.109	0.180869	100.305		38.3283	0.0345	0.0064	0.2999	20.0419	0.0661	0.0024	41.1599	0	0.0083	0.1774	100.125	78.5434		78.4602	0.15	-8.2	0.411402	0.298524		48.7877	1.35295	17.4604	11.6687	0.176909	6.08075	10.2559	2.91192
					Pun 5 (Mount 1 r2)	4		47.8749	1.2374	16.025	12.7837	0.1881	8.9124	9.0214	2.8357	0.5799	0.2227	0.0988	0.1743	100.128		37.8683	0.0216	n/d	0.2761	19.7859	0.0352	0.0015	40.1473	0.0001	0.0076	0.2216	98.3652	78.3396		78.3116	0.15	-7.8	0.404221	0.299506		48.529	1.33588	17.3004	12.1765	0.20307	6.28992	9.73937	3.06138
					Pun 5 (Mount 1 r2)	2	a	47.3852	1.0918	17.0746	10.8948	0.21	9.3168	10.7531	2.4543	0.3818	0.1574	0.0792	0.1737	100.158		38.5982	0.0289	n/d	0.2739	17.8898	0.0411	0.0116	42.5615	0.0038	0.0017	0.201	99.6117	80.9181		80.9302	0.15	-8.8	0.42288	0.300233		48.0607	1.1907	18.6213	10.2416	0.229023	6.2181	11.7272	2.67662
					Pun 5 (Mount 1 r2)		a	47.03	1.0347	16.444	12.5178	0.1811	9.311	10.5034	2.4749	0.4085	0.2393	0.0808	0.2056	100.653		39.1294	0.0339	n/d	0.2629	17.9216	0.0614	0.011	42.1186	0.0062	0.0071	0.2035	99.7555	80.7285		80.7441	0.15	-5.8	0.372351	0.300302		47.1818	1.08939	17.3131	12.1102	0.190672	7.26483	11.0585	2.60571
					Pun 5 (Mount 1 r2)		b	46.7365	1.0312	15.446	15.0653	0.2184	9.0965	9.5409	2.4356	0.3822	0.1734	0.08	0.2216	100.656		38.4094	0.0227	n/d	0.2974	19.0068	0.0772	0	41.3182	0.01	0.0035	0.1919	99.3371	79.4862		79.4905	0.15	-2.4	0.326772	0.300079		46.6022	1.04907	15.7137	14.8658	0.222185	8.24279	9.70626	2.47781
					Pun 5 (Mount 1 r2)	5		46.035	0.9682	15.6953	14.4421	0.2202	9.0647	10.2805	2.2451	0.314	0.1621	0.0765	0.1963	99.9272		37.8001	0.0249	n/d	0.3261	20.1682	0.0655	0.0019	40.2621	0.0042	0.0029	0.2324	98.8882	78.062		78.0319	0.15	-5.8	0.369892	0.299473		46.5027	1.02696	16.6478	14.1054	0.233564	7.1679	10.9044	2.38135
					Pun 5 (Mount 1 r2)	6		46.3515	1.0083	14.4894	15.8392	0.1991	8.8129	10.2401	2.3424	0.2899	0.137	0.0809	0.2284	100.285		38.3241	0.019	n/d	0.2774	18.4627	0.0764	0.0014	41.5841	0.0036	0	0.1954	98.9442	80.0584		80.0011	0.15	0.8	0.290626	0.298927		46.1632	0.997432	14.3332	15.8177	0.196954	9.05228	10.1297	2.31715
Inter-caldera scoria	Kakuki	<0.1 km3	38°29'34.91"S 176° 7'56.73"E	Scoria	Kak 1 (Mount 1)	1		48.0006	1.0337	15.0571	12.4505	0.163	9.3378	9.543	2.5133	0.3739	0.2372	0.0478	0.148939	99.0556		39.38	0.0191	0.003	0.2648	16.3731	0.0437	0.0005	43.4441	0	0.0044	0.1972	99.73	82.5464		82.5544	0.15	-2.8	0.332536	0.300165		48.6873	1.07295	15.6288	12.4517	0.169189	8.42959	9.90535	2.60873
					Kak 1 (Mount 1)	2		46.3512	1.1738	13.7769	14.2186	0.241	11.8466	8.5956	2.4174	0.3445	0.218	0.0523	0.148439	99.5323		37.9882	0.0703	0.0167	0.2852	19.0454	0.0774	0.0066	41.0232	0.0086	0.0111	0.2216	98.7542	79.3359		79.3546	0.15	-13.8	0.45507	0.300343		47.6618	1.35431	15.8956	13.5473	0.278062	7.44954	9.91748	2.78916
					Kak 1 (Mount 1)	3		46.6264	1.0656	15.4642	14.1186	0.2582	8.7855	10.2872	2.4648	0.2736	0.2048	0.048	0.1607	99.918		38.9782	0.0472	0.0231	0.2537	17.0217	0.1664	0	43.3696	0.0159	0.0073	0.222	100.105	81.9542		81.9564	0.15	1.2	0.287325	0.300044		46.5424	1.05292	15.2801	14.1556	0.255127	9.19842	10.1648	2.43546
Inter-caldera scoria	Kinloch	<0.1 km3	38°39'34.39"S 175°54'19.23"E	Scoria	Kin 1 (Mount 1)	2	a	48.9357	1.1542	14.5578	10.6561	0.1993	9.6004	9.969	2.2426	0.2683	0.2033	0.0713	0.1717	98.2008		38.7673	0.0376	0	0.2635	16.1699	0.079	0.0052	42.9689	0.0104	0.0092	0.2271	98.5381	82.5679		82.6346	0.15	-7.4	0.398864	0.301395		50.6435	1.26772	15.9896	10.4171	0.218902	7.09169	10.9495	2.46317
					Kin 1 (Mount 1)		a	49.1324	1.1634	14.5651	10.8221	0.1859	9.6383	9.8544	2.284	0.2471	0.2008	0.0676	0.1714	98.5526		38.8763	0.038	0	0.2736	16.3803	0.0623	0.0093	43.1558	0.0092	0.0092	0.2237	99.0377	82.4439		82.4944	0.15	-7.4	0.397697	0.301048		50.6911	1.27355	15.9441	10.5556	0.203501	7.1163	10.7874	2.50025
					Kin 1 (Mount 1)		b	48.8343	1.1638	14.6488	10.4281	0.1788	9.6454	9.9139	2.3901	0.2771	0.224	0.0612	0.1609	98.087		38.7682	0.0215	0	0.2657	16.3972	0.0553	0.0045	43.0307	0.0062	0.0248	0.2302	98.8042	82.3869		83.3687	0.15	-7	0.414655	0.321495		50.5484	1.27453	16.0426	10.1924	0.195812	7.30938	10.8572	2.61751
					Kin 1 (Mount 1)		c	49.2264	1.1311	14.3303	10.8912	0.1664	9.6579	9.9048	2.2407	0.2839	0.1869	0.0633	0.1674	98.4176		38.7017	0.0403	0	0.308	16.2771	0.0777	0.0066	42.9784	0.0047	0.0013	0.2291	98.6248	82.4758		82.4282	0.15	-7.4	0.395107	0.299015		50.8387	1.23929	15.701	10.6428	0.182317	7.14233	10.8522	2.45503
					Kin 1 (Mount 1)		d	47.977	1.3108	14.2277	13.0377	0.2394	8.8437	9.8715	2.2669	0.2945	0.1732	0.0589	0.1658	98.6529		38.7239	0.0258	0	0.2355	16.269	0.062	0.0129	43.1806	0.0038	0.0118	0.2123	98.7378	82.5507		82.5827	0.15	0	0.300667	0.300667		48.6164	1.32827	14.4173	13.2115	0.242591	8.96157	10.0031	2.29711
					Kin 1 (Mount 1)		f	48.5281	1.1117	14.5471	11.6434	0.2072	9.3986	9.9623	2.2396	0.2682	0.1589	0.0565	0.1171	98.3558		38.6908	0.0288	0	0.268	16.2386	0.0617	0	43.2029	0.0071	0.0119	0.2238	98.7335	82.585		82.6201	0.15	-4.6	0.356944	0.300733		49.773	1.18369	15.4891	11.6114	0.220617	7.89678	10.6074	2.38462
					Kin 1 (Mount 1)	3		48.1244	1.3664	15.01	11.327	0.212	9.0879	10.3485	2.3782	0.2526	0.2285	0.0682	0.1737	98.7997		38.6104	0.0229	0	0.2607	16.347	0.0938	0.0048	43.3209	0.0123	0.0109	0.2156	98.8993	82.5285		82.5613	0.15	-4.4	0.356181	0.300684		49.1493	1.44678	15.893	11.2429	0.224472	7.61493	10.9573	2.51811
					Kin 1 (Mount 1)	5	a	47.1601	1.1528	14.1688	12.7409	0.2198	9.2473	9.4985	2.1757	0.2829	0.1892	0.0686	0.1798	97.3587		38.5523	0.0294	0	0.2868	18.1677	0.0582	0.0041	41.8793	0.0054	0.0127	0.2137	99.2096	80.4259		80.4821	0.15	-5.6	0.370422	0.301075		49.0276	1.25541	15.43	12.7907	0.239365	7.54548	10.344	2.36936
					Kin 1 (Mount 1)		b	47.7951	1.167	14.8258	12.586	0.165	8.8667	9.7756	2.3461	0.3028	0.1888	0.0676	0.1809	98.4925		38.4213	0.0241	0	0.3076	17.2674	0.0645	0.0021	42.7736	0.0073	0.0002	0.2129	99.0811	81.5339		81.5769	0.15	-2.8	0.334585	0.300859		48.8017	1.21938	15.4913	12.6509	0.172406	8.01406	10.2144	2.45141
					Kin 1 (Mount 1)	6		48.7083	1.1308	15.4266	10.8694	0.1567	9.1659	10.7445	2.0233	0.2217	0.1695	0.0615	0.1688	99.1292		39.0076	0.0294	0	0.2153	14.7357	0.0856	0.0072	44.4268	0.0151	0.0047	0.2165	98.7439	84.311		84.322	0.15	-2.4	0.329061	0.300251		49.4183	1.17002	15.9617	10.8806	0.162135	8.372	11.1172	2.09348
					Kin 1 (Mount 1)	7		48.9946	1.1679	15.2046	10.0167	0.1734	9.6489	9.9641	2.1152	0.1634	0.1825	0.0569	0.163	98.0457		39.1159	0.0306	0	0.2383	14.8827	0.1171	0.0064	44.2739	0.0227	0.0149	0.2235	98.926	84.1333		84.1734	0.15	-6.2	0.38095	0.300904		50.6576	1.26969	16.5297	9.90531	0.188512	7.53671	10.8325	2.29954
					Kin 1 (Mount 1)	8	a	47.8085	1.2651	14.4606	12.0968	0.188	9.2381	9.7972	2.2862	0.3118	0.1782	0.0714	0.1831	98.1795		37.7485	0.0331	0	0.3018	17.3484	0.0601	0.0099	42.0988	0.0039	0.0207	0.206	97.8312	81.222		81.2149	0.15	-5.6	0.37024	0.29986		49.3017	1.36595	15.6133	12.0264	0.202986	7.43845	10.5782	2.46844
					Kin 1 (Mount 1)		b	48.1625	1.2975	14.9426	12.7696	0.2288	8.866	10.031	2.4322	0.2232	0.2419	0.0771	0.1806	99.6787		37.6094	0.032	0	0.3044	17.3756	0.0769	0	42.6382	0.0051	0.0081	0.2164	98.2661	81.3917		81.3579	0.15	-2.8	0.332868	0.299332		48.5828	1.33911	15.4218	12.6817	0.236137	7.91787	10.3527	2.51019
					Kin 1 (Mount 1)	9		48.1972	1.1447	14.6341	10.1246	0.16	9.6217	10.0738	2.3309	0.2042	0.2085	0.0459	0.1659	97.0771		38.3796	0.0214	0	0.2623	16.0622	0.0604	0.0017	43.2668	0.0071	0.008	0.2249	98.2944	82.7626		82.7739	0.15	-8.4	0.415055	0.300237		50.5684	1.28631	16.4445	9.90529	0.179794	6.80926	11.32	2.61926
					Kin 1 (Mount 1)	10		49.3834	1.2402	14.9238	10.1216	0.152	9.3415	9.0708	2.4535	0.3005	0.1995	0.0674	0.1895	97.6328		37.8483	0.0287	0	0.3065	16.03	0.0953	0	43.0704	0.0108	0.0041	0.2008	97.5949	82.7263		82.7023	0.15	-7.6	0.404113	0.299495		51.4941	1.37396	16.5334	9.89265	0.168394	6.76655	10.0491	2.71812
					Kin 1 (Mount 1)	11		48.2519	1.0986	15.2828	9.9363	0.18	9.5563	10.6608	2.1117	0.2254	0.1801	0.0449	0.1663	97.8978		37.9782	0.0396	0	0.2332	15.0697	0.1168	0.0103	43.963	0.0258	0.0072	0.2226	97.6664	83.8708		83.9054	0.15	-6.6	0.38785	0.300769		49.9807	1.20132	16.7118	9.79746	0.196831	7.30716	11.6576	2.30915
					Kin 1 (Mount 1)			48.4067	1.2559	15.2087	10.1768	0.1851	9.331	10.6279	2.0597	0.2255	0.1457	0.0537	0.1632	98.0329		38.4052	0.0382	0	0.2464	14.7548	0.0893	0.0005	44.1554	0.0197	0.0074	0.2192	97.9362	84.2125		84.1772	0.15	-4.8	0.360452	0.299205		49.8758	1.34602	16.3	10.1539	0.198382	7.72809	11.3905	2.20749
					Kin 1 (Mount 1 r2)	7		48.0719	1.1948	15.3208	9.8597	0.1731	9.6339	10.7693	2.206	0.2396	0.1479	0.0621	0.1843	98.0732		39.1159	0.0306	0	0.2383	14.8827	0.1171	0.0064	44.2739	0.0227	0.0149	0.2235	98.926	84.1333		84.1298	0.15	-6.6	0.386415	0.299922		49.69	1.30413	16.7228	9.71199	0.18894	7.36549	11.7548	2.40787
					Kin 1 (Mount 1 r2)	8	a	48.2011	1.3082	14.4763	11.9672	0.2336	9.2376	9.8108	2.3623	0.2621	0.2187	0.072	0.1887	98.5828		37.7485	0.0331	0	0.3018	17.3484	0.0601	0.0099	42.0988	0.0039	0.0207	0.206	97.8312	81.222		81.2569	0.15	-5.8	0.374229	0.300687		49.5052	1.4085	15.5862	11.8172	0.251511	7.32923	10.563	2.54342
					Kin 1 (Mount 1 r2)		b	47.8388	1.3221	15.1031	12.3534	0.2091	8.8455	10.0071	2.0696	0.2743	0.2587	0.068	0.1862	98.7217		37.6094	0.032	0	0.3044	17.3756	0.0769	0	42.6382	0.0051	0.0081	0.2164	98.2661	81.3917		81.3344	0.15	-3.6	0.343287	0.298869		48.7905	1.3889	15.8662	12.3293	0.219664	7.6859	10.5127	2.17416
					Kin 1 (Mount 1 r2)	9	a	48.2448	1.1502	14.6177	10.1456	0.1846	9.6531	10.2059	2.26	0.2869	0.2173	0.0714	0.1837	97.4055		38.3796	0.0214	0	0.2623	16.0622	0.0604	0.0017	43.2668	0.0071	0.008	0.2249	98.2944	82.7626		82.8136	0.15	-8.4	0.415547	0.301076		50.4462	1.288	16.369	9.89441	0.206717	6.82078	11.4287	2.53077
					Kin 1 (Mount 1 r2)		b	49.2212	1.1525	14.5953	10.5017	0.1855	9.4667	10.1214	2.094	0.2727	0.2052	0.0682	0.1511	98.1937		38.0404	0.0313	0	0.2596	16.3591	0.079	0.009	43.1303	0.0056	0.0112	0.2197	98.1451	82.4541		82.4538	0.15	-7.6	0.402251	0.299994		50.9804	1.2684	16.0631	10.2268	0.204155	6.8753	11.1393	2.30459
					Kin 1 (Mount 1 r2)		c	48.7816	1.1604	14.8025	10.6795	0.1692	9.4758	10.0618	2.3113	0.271	0.1781	0.0658	0.1769	98.3363		37.6517	0.0269	0	0.2779	16.3094	0.0799	0.0061	42.9888	0.0105	0.0077	0.2185	97.5774	82.4506		82.481	0.15	-7.2	0.396031	0.300632		50.3955	1.27047	16.2065	10.4352	0.185249	7.02867	11.0162	2.53053
					Kin 1 (Mount 1 r2)	10	a	48.2014	1.1513	14.6706	10.5151	0.1853	9.5085	10.2246	2.2466	0.2697	0.1901	0.0678	0.1609	97.5627		38.1363	0.0219	0	0.2556	15.9641	0.0941	0	43.433	0.0054	0.0108	0.2126	98.1339	82.9043		82.8488	0.15	-7	0.391025	0.298829		50.1415	1.26824	16.1607	10.3815	0.204121	7.17424	11.2631	2.47479
					Kin 1 (Mount 1 r2)		a	48.5406	1.2881	14.5099	10.3005	0.2159	9.3126	9.6535	2.5084	0.3573	0.228	0.0724	0.1733	97.3398		37.8483	0.0287	0	0.3065	16.03	0.0953	0	43.0704	0.0108	0.0041	0.2008	97.5949	82.7263		82.7771	0.15	-7	0.395866	0.30107		50.6485	1.42262	16.0252	10.1599	0.238447	6.98591	10.6616	2.77036
					Kin 1 (Mount 1 r2)		b	48.8824	1.2839	14.4665	10.2164	0.161	9.3318	9.5676	2.4847	0.3658	0.2027	0.0673	0.1768	97.3831		37.8311	0.0226	0	0.2599	16.0816	0.095	0.0074	43.1473	0.0136	0.0089	0.2021	97.6694	82.7059		82.8168	0.15	-7.2	0.40052	0.302341		51.0247	1.42021	16.0024	10.048	0.178093	6.92818	10.5834	2.74849
					Kin 1 (Mount 1 r2)	11	a	48.0794	1.2324	15.341	9.7043	0.1937	9.5696	10.6464	2.1219	0.2355	0.1757	0.0621	0.1807	97.766		37.7691	0.0316	0	0.2267	14.7391	0.1093	0.0049	44.0884	0.0261	0.0064	0.2192	97.2207	84.2065		84.224	0.15	-6.6	0.387844	0.300395		49.8733	1.34994	16.8041	9.58069	0.212173	7.31748	11.6618	2.32427
					Kin 1 (Mount 1 r2)		a	48.6822	1.1157	15.1774	9.886	0.1958	9.4904	10.6525	2.1356	0.2374	0.1559	0.0583	0.1635	98.1179		37.9782	0.0396	0	0.2332	15.0697	0.1168	0.0103	43.963	0.0258	0.0072	0.2226	97.6664	83.8708		83.8475	0.15	-6.6	0.387135	0.299484		50.3111	1.21663	16.5504	9.7154	0.213513	7.215	11.6162	2.3288
					Kin 1 (Mount 1 r2)		b	48.5626	1.1478	15.1643	9.8359	0.1804	9.5792	10.6901	2.1547	0.2196	0.1671	0.06	0.1803	98.1219		38.6741	0.0379	0	0.2565	14.9396	0.1117	0.0081	44.1257	0.0307	0.0047	0.2109	98.4	84.0373		84.0736	0.15	-6.6	0.387921	0.300812		50.1839	1.25176	16.5378	9.67192	0.19674	7.30432	11.6584	2.34987
					Kin 1 (Mount 1 r2)		c	48.1406	1.279	15.2948	10.5894	0.1884	9.3917	10.6336	2.1314	0.238	0.1464	0.0609	0.1735	98.4628		38.4052	0.0382	0	0.2464	14.7548	0.0893	0.0005	44.1554	0.0197	0.0074	0.2192	97.9362	84.2125		84.1872	0.15	-4	0.348661	0.299429		49.2825	1.35332	16.1836	10.5826	0.199348	8.06041	11.2515	2.25526
					Kin 1 (Mount 1 r2)		d	48.0329	1.2023	15.2757	9.9368	0.1752	9.5792	10.7127	2.1967	0.2252	0.1552	0.0667	0.1674	97.8932		38.4052	0.0382	0	0.2464	14.7548	0.0893	0.0005	44.1554	0.0197	0.0074	0.2192	97.9362	84.2125		84.2659	0.15	-6	0.378977	0.301208		49.6591	1.3062	16.5957	9.84699	0.19034	7.54466	11.6384	2.38653
					Kin 1 (Mount 1 r2)	12		50.3534	1.2543	15.2442	11.8103	0.2428	7.6671	10.305	2.5422	0.3027	0.2156	0.0519	0.0629	100.135		38.1178	0.0163	0	0.2964	18.2774	0.0248	0.0051	41.6708	0.0041	0.0052	0.1978	98.6156	80.252		80.2189	0.15	-2.6	0.334992	0.299376		50.5221	1.2842	15.6076	11.6076	0.248588	6.73437	10.5507	2.60281
				Scoria	Kin 1 (Mount 2)	1		48.246	1.0764	15.1351	10.0696	0.1548	9.1003	10.9783	2.2628	0.2358	0.1923	0.0687	0.1773	97.8879		38.9983	0.0398	0	0.2543	14.8781	0.1053	0.0021	44.3637	0.0168	0.0022	0.2315	98.8922	84.1644		84.1455	0.15	-4.4	0.35657	0.299575		49.7398	1.15069	16.1796	10.0727	0.165483	7.64804	11.7359	2.41896
					Kin 1 (Mount 2)	2	a	48.3986	1.2655	14.2472	12.2398	0.2241	9.3449	9.839	2.31	0.2644	0.1707	0.0598	0.1904	98.7445		38.6066	0.0327	0	0.2732	17.6081	0.0388	0.0043	42.1747	0.0093	0.022	0.2181	98.9878	81.022		81.0169	0.15	-6	0.375009	0.2999		49.6234	1.36208	15.3345	12.0601	0.241202	7.36354	10.5899	2.48629
					Kin 1 (Mount 2)		b	47.3836	1.3487	14.2405	12.9976	0.2115	9.0633	9.7123	2.2824	0.2753	0.216	0.06	0.169	98.129		38.5455	0.027	0	0.2684	17.4006	0.083	0.0083	42.3628	0.0123	0.0125	0.2276	98.9479	81.2715		81.2283	0.15	-3.2	0.336964	0.299151		48.5633	1.41948	14.9878	13.0977	0.222599	8.1082	10.222	2.40217
					Kin 1 (Mount 2)		c	47.8447	1.3233	14.4437	12.3051	0.2302	9.1842	9.9058	2.2628	0.244	0.1783	0.0691	0.2067	98.4346		38.9814	0.0337	0	0.2762	17.7122	0.0629	0.0029	42.5981	0.0046	0.0115	0.22	99.9037	81.0849		81.1019	0.15	-5.2	0.365106	0.300332		49.1335	1.41812	15.4786	12.2248	0.246694	7.5055	10.6156	2.42493
					Kin 1 (Mount 2)	3		48.5119	1.2771	14.5729	11.4949	0.1592	9.2363	10.2796	2.3441	0.2733	0.2051	0.0613	0.1768	98.7921		39.4013	0.0289	0	0.2825	15.8941	0.0586	0.0054	43.4778	0.0026	0.0055	0.2225	99.3793	82.981		82.9472	0.15	-3.8	0.345575	0.299283		49.4858	1.34374	15.3334	11.4642	0.167508	7.97765	10.816	2.46643
					Kin 1 (Mount 2)	4		47.3533	1.3664	14.4032	13.1213	0.2066	8.5072	9.8678	2.3634	0.3798	0.2088	0.0655	0.1929	98.2288		38.8948	0.028	0	0.2946	17.7333	0.0794	0	42.2925	0.008	0.0149	0.2286	99.5741	80.9559		80.9912	0.15	-1.6	0.319828	0.300688		48.3425	1.4136	14.9008	13.2818	0.213737	8.0959	10.2087	2.44504
Internal standard	Internal standard			Average (n=34)	BHVO-2G			54.9759	2.36284	13.8881	12.5408	0.196368	3.62517	7.19149	2.94007	1.77645	0.375947	0.00564118	0.00312647
Internal standard	Internal standard			2 SD % (precision)	BHVO-2G			1.99775	2.33385	2.75053	5.00997	19.3078	1.36094	2.20204	4.81841	5.9257	7.2422	150.898	214.693
Internal standard	Internal standard			GeoRem rec. value	BHVO-2G			54.4	2.27	13.4	12.4	0.19	3.56	7.06	3.23	1.74	0.37	-	-
Internal standard	Internal standard			% offset (accuracy)	BHVO-2G			1.05872	4.08979	3.64223	1.13589	3.35139	1.83072	1.86244	-8.97605	2.095	1.60731
Internal standard	Internal standard			Average (n=28)	LO-02-04ii			49.057	2.47046	12.4975	11.0131	0.170718	8.80865	10.9099	2.25622	0.531282	0.272079	0.148639	0.129546
Internal standard	Internal standard			2 SD % (precision)	LO-02-04ii			1.46808	2.95574	3.59418	5.05265	27.0133	9.36887	3.76892	8.84007	10.2287	10.1334	63.5035	20.0044
For melt inclusion rehomogenization, olivines were held at a predetermined near-liquidus temperature, calculated from host whole-rock major element compositions using COMAGMAT (Ariskin and Barmina, 2004), using a 1 atmosphere Deltech vertical quench furnace at Oregon State University. A CO2-H2 atmosphere was used to maintain the oxygen fugacity slightly below the fayalite-magnetite-quartz (FMQ) o…
References cited:	Ariskin A. A., & Barmina G. S. (2004). COMAGMAT: Development of a magma crystallization model and its petrological applications. Geochemistry International 42, S1–S157.
	Danyushevsky, L. V., & Plechov, P. (2011). Petrolog3: Integrated software for modeling crystallization processes. Geochemistry, Geophysics, Geosystems 12, Q07021.
	Danyushevsky, L. V., McNeill, A. W., & Sobolev, A. V. (2002). Experimental and petrological studies of melt inclusions in phenocrysts from mantle-derived magmas: an overview of techniques, advantages and complications. Chemical Geology 183, 5–24.
	Ford, C. E., Russel, D.G., Roven, J.A., & Fisk, M.R. (1983). Distribution coefficients of Mg2+, Fe2+, Ca2+ and Mn2+ between olivine and melt. Journal of Petrology 24, 256–265.
	Hauri, E. H. (2002). SIMS analysis of volatiles in silicate glasses, 2: isotopes and abundances in Hawaiian melt inclusions. Chemical Geology 183, 115–141.
	Jochum, K. P., Stoll, B., Herwig, K., Willbold, et al. (2006). TI MPI-DING reference glasses for in situ microanalysis: New reference values for element concentrations and isotope ratios. Geochemistry, Geophysics, Geosystems 7, Q02008.
	Kress, V. C, & Carmichael, I. S. E. (1988). Stoichiometry of the iron oxidation reaction in silicate melts. American Mineralogist 73, 1267–1274.
	Nielsen, R. L., Michael, P. J., & Sours-Page, R. (1998). Chemical and physical indicators of compromised melt inclusions. Geochimica et Cosmochimica Acta, 62, 831–839.
	Rowe, M. C., Peate, D. W, Newbrough, A. (2011). Compositional and thermal evolution of olivine-hosted melt inclusions in small-volume basaltic eruptions: a “simple” example from Dotsero Volcano, NW Colorado. Contributions to Mineralogy and Petrology 161, 197–211.
	Rowe, M. C., Lassiter, J. C., & Goff, K. (2015). Basalt volatile fluctuations during continental rifting: An example from the Rio Grande Rift, USA. Geochemistry, Geophysics, Geosystems, 16, 1254–1273.
	Wallace, P., & Carmichael, I. S. (1992). Sulfur in basaltic magmas. Geochimica et Cosmochimica Acta, 56, 1863–1874.
[truncated: 17 more columns]
